# Supplementary material
Source: PubMed Central journal article supplement (PMC4347990)
Supplement: NIHMS648832-supplement-Supplemental_Digital_Content.pdf [file NIHMS648832-supplement-Supplemental_Digital_Content.pdf]

## **Appendix.**

In addition to the authors, other members of the Eunice Kennedy Shriver National Institute of Child Health and Human Development Maternal–Fetal Medicine Units Network are as follows:

Case Western Reserve University-MetroHealth Medical Center, Cleveland, OH – B. Mercer, C. Milluzzi, W. Dalton, T. Dotson, P. McDonald, C. Brezine, A. McGrail

Northwestern University, Chicago, IL – G. Mallett, M. Ramos-Brinson, A. Roy, L. Stein, P. Campbell, C. Collins, N. Jackson, M. Dinsmoor (NorthShore University HealthSystem), J. Senka (NorthShore University HealthSystem), K. Paychek (NorthShore University HealthSystem), A. Peaceman

Columbia University, New York, NY – M. Talucci, M. Zylfijaj, Z. Reid (Drexel U.), R. Leed (Drexel U.), J. Benson (Christiana H.), S. Forester (Christiana H.), C. Kitto (Christiana H.), S. Davis (St. Peter's UH.), M. Falk (St. Peter's UH.), C. Perez (St. Peter's UH.)

University of Utah Health Sciences Center, Salt Lake City, UT – K. Hill and A. Sowles; J. Postma, S. Alexander and G. Andersen (LDS Hospital); V. Scott and V. Morby (McKay-Dee); K. Jolley, J. Miller and B. Berg (UVRMC).

University of North Carolina at Chapel Hill, Chapel Hill, NC – J. Thorp, K. Dorman, J. Mitchell, E. Kaluta, K. Clark (WakeMed), K. Spicer (WakeMed), S. Timlin (Rex), K. Wilson (Rex)

University of Texas Southwestern Medical Center, Dallas, TX – L. Moseley, M. Santillan, J. Price, K. Buentipo, V. Bludau, T. Thomas, L. Fay, C. Melton, J. Kingsbery, R. Benezue

University of Pittsburgh, Pittsburgh, PA – S. Caritis, H. Simhan, M. Bickus, D. Fischer, T. Kamon (deceased), D. DeAngelis

The Ohio State University, Columbus, OH – P. Shubert (St. Ann's), C. Latimer, L. Guzzo (St. Ann's), F. Johnson, L. Gerwig (St. Ann's), S. Fyffe, D. Loux (St. Ann's), S. Frantz, D. Cline, S. Wylie, J. Iams

University of Alabama at Birmingham, Birmingham, AL – M. Wallace, A. Northen, J. Grant, C. Colquitt

University of Texas Medical Branch, Galveston, TX – J. Moss, A. Salazar, A. Acosta, G. Hankins

Wayne State University, Detroit, MI – Y. Sorokin, N. Hauff, L. Palmer, P. Lockhart, D. Driscoll, L. Wynn, C. Sudz, D. Dengate, C. Girard, S. Field

Bailit JL, Grobman W, Murguia Rice M, Reddy UM, Wapner RJ, Varner MW, et al. Morbidly adherent placenta: treatments and outcomes. *Obstet Gynecol* 2015;125.

The authors provided this information as a supplement to their article.

Brown University, Providence, RI – P. Breault, F. Smith, N. Annunziata, D. Allard, J. Silva, M. Gamage, J. Hunt, J. Tillinghast, N. Corcoran, M. Jimenez

The University of Texas Health Science Center at Houston-Children's Memorial Hermann Hospital, Houston, TX – F. Ortiz, P. Givens, B. Rech, C. Moran, M. Hutchinson, Z. Spears, C. Carreno, B. Heaps, G. Zamora

Oregon Health & Science University, Portland, OR – J. Tolosa, J. Seguin, M. Rincon, J. Snyder, C. Farrar, E. Lairson, C. Bonino, W. Smith (Kaiser Permanente), K. Beach (Kaiser Permanente), S. Van Dyke (Kaiser Permanente), S. Butcher (Kaiser Permanente)

The George Washington University Biostatistics Center – E. Thom, Y. Zhao, P. McGee, V. Momirova, R. Palugod, B. Reamer, M. Larsen, V. Bhandaru

Eunice Kennedy Shriver National Institute of Child Health and Human Development, Bethesda, MD – C. Spong, S. Tolivaisa

MFMU Network Steering Committee Chair (Medical University of South Carolina, Charleston, SC) – J. P. Van Dorsten, M.D.

Bailit JL, Grobman W, Murguia Rice M, Reddy UM, Wapner RJ, Varner MW, et al. Morbidly adherent placenta: treatments and outcomes. *Obstet Gynecol* 2015;125.

The authors provided this information as a supplement to their article.
